# Supplementary material for: Subterranean biodiversity and depth distribution of myriapods in forested scree slopes of Central Europe
Source: Zookeys. 2020 Apr 28;930:117–37. doi: 10.3897/zookeys.930.48914 (PMC7203530; doi:10.3897/zookeys.930.48914)
Supplement: Supplementary material 1 — Table S1 [file zookeys-930-117-s001.xlsx]

## Sheet: Table 2
	Supplementary file 1: Table S1. List of sampled centipede species and community characteristics. Abbreviations: D-Dominance, C-Constancy. Coloured boxes indicate number of individuals in given depth. The numbers indicating particular studied scree slopes are stated in Fig. 1.
	Chilopoda	Locality											Σ	D (%)	C (%)	Depth (cm)
	Species	1	2	3	4	5	6	7	8	9	10	11				5-15	25-45	55-95
	Clinopodes flavidus C.L. Koch, 1847	-	-	-	3	-	-	-	-	-	-	-	3	1.10701	9.09091
	Cryptops parisi Brölemann, 1920	5	-	2	-	-	2	-	-	2	-	-	11	4.05904	36.3636
	Geophilus electricus (Linnaeus, 1758)	-	-	-	-	-	-	-	1	-	-	-	1	0.369004	9.09091
	Geophilus insculptus Attems, 1895	-	-	-	-	1	-	1	-	-	-	-	2	0.738007	18.1818
	Geophilus flavus (De Geer, 1778)	-	2	2	3	-	-	-	-	-	-	-	7	2.58303	27.2727
	Harpolithobius anodus (Latzel,1880)	-	-	-	-	-	4	1	1	-	-	-	6	2.21402	27.2727
	Lamyctes emarginatus (Newport, 1844)	-	-	-	-	-	-	-	-	-	-	6	6	2.21402	9.09091
	Lithobius agilis C.L. Koch, 1847	-	-	-	-	-	-	2	-	2	-	-	4	1.47601	18.1818
	Lithobius austriacus (Verhoeff, 1937)	-	-	-	-	2	-	-	-	-	-	-	2	0.738007	9.09091
	Lithobius cyrtopus Latzel, 1880	-	1	-	-	-	-	-	-	-	-	-	1	0.369004	9.09091
	Lithobius dentatus C.L.Koch, 1844	-	-	-	-	-	-	-	1	-	-	-	1	0.369004	9.09091
	Lithobius forficatus (Linnaeus, 1758)	5	4	10	21	46	4	10	25	1	-	-	126	46.4945	81.8182
	Lithobius lucifugus L. Koch, 1862	-	-	-	-	2	18	4	-	4	9	-	37	13.6531	45.4545
	Lithobius macilentus L. Koch, 1862	-	-	-	-	-	-	-	-	-	3	-	3	1.10701	9.09091
	Lithobius microps Meinert, 1868	-	1	-	-	-	-	-	-	-	-	-	1	0.369004	9.09091
	Lithobius mutabilis L. Koch, 1862	-	-	-	-	2	-	-	-	2	5	-	9	3.32103	27.2727
	Lithobius muticus C.L. Koch, 1847	-	-	-	5	3	-	-	-	-	-	-	8	2.95203	18.1818
	Lithobius nodulipes Latzel, 1880	-	-	-	-	-	-	3	-	-	1	-	4	1.47601	18.1818
	Lithobius tenebrosus Meinert, 1872	-	-	-	-	-	-	-	1	-	-	-	1	0.369004	9.09091
	Lithobius tenebrosus fennoscandius Lohmander, 1948	-	-	-	-	-	-	-	-	-	8	-	8	2.95203	9.09091
	Strigamia acuminata (Leach, 1814)	-	-	2	1	5	-	-	-	-	6	-	14	5.16605	36.3636
	Strigamia crassipes (C.L. Koch, 1835)	-	-	2	-	-	-	-	-	-	-	-	2	0.738007	18.1818
	Strigamia transsilvanica (Verhoeff, 1928)	-	2	-	-	1	1	1	2	-	7	-	14	5.16605	45.4545
	Σ (indiv.)	10	10	18	33	62	29	22	31	11	39	6	271
	Σ (spp.)	2	5	5	6	8	5	7	6	5	7	1	23			19	18	15
	Symphyla		1	2	8	3							14
															0–5 ind.	6–20 ind.	21–50 ind.	> 50 ind.
